# Supplementary material for: Patient experiences of receiving a diagnosis of Parkinson’s disease
Source: Springer Nature journal article supplement (doi:10.1007/s00415-018-8817-8), 2018-03-15
Supplement: 415_2018_8817_MOESM2_ESM.pdf [file 415_2018_8817_MOESM2_ESM.pdf]

## 1. Introduction

©<sup>®</sup>™

This survey is part of My PD Journey, a multi-stakeholder project by the European Parkinson's Disease Association (EPDA).

With over 1.2 million people in Europe currently living with Parkinson's and this number forecast to double by 2030, My PD Journey aims to ensure that all care providers are coordinated and work together to remove the hurdles that prevent people with Parkinson's from receiving early and appropriate treatment and individualised care.

We would be most grateful if you would share your experiences of receiving a diagnosis, treatment and care for Parkinson's. This will help us understand how well healthcare systems are currently meeting the needs of people with Parkinson's and their families across Europe.

This survey should be completed by a person with Parkinson's disease, or by a family member / carer / healthcare professional on behalf of the person with Parkinson's. Any information you provide will be completely anonymous and treated in confidence.

The survey should take no more than 20 minutes. It is very important each person with Parkinson's completes the survey only once. This survey closes on 31 December 2014. If you have any questions about the survey, please email us at [merrittrk@googlemail.com](mailto:merrittrk@googlemail.com).

Thank you very much in advance for your time and help in completing this survey.

## 2. About you

### 1. In what year were you diagnosed with Parkinson's disease?

### 2. Are you male or female?

- Male
- Female

### 3. How would you describe the area that you live in?

- Rural
- Town
- City

### 4. Which country do you currently live in?

- |                               |                                   |                                      |
|-------------------------------|-----------------------------------|--------------------------------------|
| <input type="radio"/> Denmark | <input type="radio"/> Ireland     | <input type="radio"/> Spain          |
| <input type="radio"/> France  | <input type="radio"/> Italy       | <input type="radio"/> Sweden         |
| <input type="radio"/> Germany | <input type="radio"/> Netherlands | <input type="radio"/> United Kingdom |
| <input type="radio"/> Hungary | <input type="radio"/> Slovenia    |                                      |

### 5. Are you currently employed?

- Yes
- No

### 6. What is/was your occupation?

### 13. Which of the following statements best describes how you feel about your independence?

- I am able to do all chores without slowness, difficulty or impairment
- I am able to do all chores with some degree of slowness, difficulty and impairment, and am beginning to be aware of difficulty
- Chores take twice as long and I am conscious of difficulty and slowness
- Chores take three to four times as long and I spend a large part of the day doing these
- I can do most chores, but exceedingly slowly and requiring a lot of effort
- I need help with half the chores and have difficulty with everything
- I can assist with all the chores, but am only able to do a few on my own
- I can manage a few chores with some effort, but need a lot of help
- I do nothing on my own, but can be a slight help with some chores
- I am totally dependent and helpless
- I am bedridden

## 5. Getting a diagnosis of Parkinson's disease

### 14. How old were you when you were first diagnosed with Parkinson's?

Years

### 15. How long has it been since you were first diagnosed with Parkinson's?

- Less than 1 year
- At least 1 year but less than 2 years
- At least 2 years but less than 3 years
- At least 3 years but less than 5 years
- At least 5 years but less than 10 years
- More than 10 years

### 16. Which country were you living in when you were first diagnosed with Parkinson's?

- |                                              |                                   |                                      |
|----------------------------------------------|-----------------------------------|--------------------------------------|
| <input type="radio"/> Denmark                | <input type="radio"/> Ireland     | <input type="radio"/> Spain          |
| <input type="radio"/> France                 | <input type="radio"/> Italy       | <input type="radio"/> Sweden         |
| <input type="radio"/> Germany                | <input type="radio"/> Netherlands | <input type="radio"/> United Kingdom |
| <input type="radio"/> Hungary                | <input type="radio"/> Slovenia    |                                      |
| <input type="radio"/> Other (please specify) |                                   |                                      |

## 6. Getting a diagnosis of Parkinson's disease

**18. How long was it before you sought medical help after you first noticed your symptoms?**

- Less than 1 month
- At least 1 month but less than 3 months
- At least 3 months but less than 6 months
- At least 6 months but less than 12 months
- 12 months or more
- Cannot remember

**19. What happened during your first appointment with a healthcare professional?  
(Please select ALL that apply)**

- Discussed your general medical history
- Carried out a physical examination
- Observed your symptom(s)
- Referred you to a specialist, or another doctor / healthcare professional
- Said nothing was wrong
- Said it was too early to tell if anything was wrong
- Said something was wrong, but not sure what
- Prescribed medication to relieve your symptom(s)
- Explained that you may have Parkinson's
- Explained that you may have another disease / condition
- Other (please specify)

**8. Getting a diagnosis of Parkinson's disease**

**20. If you were referred to another healthcare professional, how long did it take before you saw them? (Please select ONE option in EACH row)**

|                                                | Within 1 month        | At least 1 month but less than 2 months | At least 2 months but less than 3 months | At least 3 months but less than 4 months | 4 months or more      | Cannot remember       | Does not apply        |
|------------------------------------------------|-----------------------|-----------------------------------------|------------------------------------------|------------------------------------------|-----------------------|-----------------------|-----------------------|
| General neurologist                            | <input type="radio"/> | <input type="radio"/>                   | <input type="radio"/>                    | <input type="radio"/>                    | <input type="radio"/> | <input type="radio"/> | <input type="radio"/> |
| Neurologist who is a specialist in Parkinson's | <input type="radio"/> | <input type="radio"/>                   | <input type="radio"/>                    | <input type="radio"/>                    | <input type="radio"/> | <input type="radio"/> | <input type="radio"/> |
| Care of the elderly doctor (geriatrician)      | <input type="radio"/> | <input type="radio"/>                   | <input type="radio"/>                    | <input type="radio"/>                    | <input type="radio"/> | <input type="radio"/> | <input type="radio"/> |
| Parkinson's disease nurse specialist           | <input type="radio"/> | <input type="radio"/>                   | <input type="radio"/>                    | <input type="radio"/>                    | <input type="radio"/> | <input type="radio"/> | <input type="radio"/> |
| Physiotherapist                                | <input type="radio"/> | <input type="radio"/>                   | <input type="radio"/>                    | <input type="radio"/>                    | <input type="radio"/> | <input type="radio"/> | <input type="radio"/> |
| Occupational therapist                         | <input type="radio"/> | <input type="radio"/>                   | <input type="radio"/>                    | <input type="radio"/>                    | <input type="radio"/> | <input type="radio"/> | <input type="radio"/> |
| Speech and language therapist                  | <input type="radio"/> | <input type="radio"/>                   | <input type="radio"/>                    | <input type="radio"/>                    | <input type="radio"/> | <input type="radio"/> | <input type="radio"/> |

**21. What examinations or tests were carried out to confirm if you had Parkinson's? (Please select ALL that apply)**

- General medical history
- Physical examination
- Observation of your symptoms
- Blood or urine tests
- Brain scan (e.g. CT, MRI, DaTSCAN)
- Genetic testing
- Other (please specify)

**9. Getting a diagnosis of Parkinson's disease**

**22. Who gave you the diagnosis of Parkinson's?**

- General practitioner or family doctor
- Hospital doctor
- General neurologist
- Neurologist who is a specialist in Parkinson's
- Care of the elderly doctor (geriatrician)
- Cannot remember
- Other (please specify)

### 23. How sensitively were you told you had Parkinson's?

|                       |                       |                       |                        |                       |
|-----------------------|-----------------------|-----------------------|------------------------|-----------------------|
| Very sensitively      | Quite sensitively     | Not very sensitively  | Not at all sensitively | Cannot remember       |
| <input type="radio"/> | <input type="radio"/> | <input type="radio"/> | <input type="radio"/>  | <input type="radio"/> |

### 24. How satisfied were you with the consultation when the initial diagnosis was given?

|                       |                       |                       |                       |                       |                       |
|-----------------------|-----------------------|-----------------------|-----------------------|-----------------------|-----------------------|
| Very satisfied        | Satisfied             | Neutral               | Dissatisfied          | Very dissatisfied     | Cannot remember       |
| <input type="radio"/> | <input type="radio"/> | <input type="radio"/> | <input type="radio"/> | <input type="radio"/> | <input type="radio"/> |

## 10. Getting a diagnosis of Parkinson's disease

### 25. When you were given your diagnosis, what information were you given? (Please select ONE option for EACH row)

|                                                                                              | Leaflet/handouts/signposting to online information | Explained verbally    | Both handout and verbal information | I did not want any information | No information was provided | Cannot remember       |
|----------------------------------------------------------------------------------------------|----------------------------------------------------|-----------------------|-------------------------------------|--------------------------------|-----------------------------|-----------------------|
| Symptoms, diagnosis and causes of Parkinson's                                                | <input type="radio"/>                              | <input type="radio"/> | <input type="radio"/>               | <input type="radio"/>          | <input type="radio"/>       | <input type="radio"/> |
| Medication                                                                                   | <input type="radio"/>                              | <input type="radio"/> | <input type="radio"/>               | <input type="radio"/>          | <input type="radio"/>       | <input type="radio"/> |
| Surgical treatments                                                                          | <input type="radio"/>                              | <input type="radio"/> | <input type="radio"/>               | <input type="radio"/>          | <input type="radio"/>       | <input type="radio"/> |
| Non-drug treatments (e.g. physiotherapy, occupational therapy, complementary therapies etc.) | <input type="radio"/>                              | <input type="radio"/> | <input type="radio"/>               | <input type="radio"/>          | <input type="radio"/>       | <input type="radio"/> |
| Maintaining physical well being (e.g. healthy eating, exercise etc.)                         | <input type="radio"/>                              | <input type="radio"/> | <input type="radio"/>               | <input type="radio"/>          | <input type="radio"/>       | <input type="radio"/> |
| Maintaining emotional well being (e.g. anxiety, mood changes etc.)                           | <input type="radio"/>                              | <input type="radio"/> | <input type="radio"/>               | <input type="radio"/>          | <input type="radio"/>       | <input type="radio"/> |
| Financial help available                                                                     | <input type="radio"/>                              | <input type="radio"/> | <input type="radio"/>               | <input type="radio"/>          | <input type="radio"/>       | <input type="radio"/> |
| Support organisations (e.g. patient associations)                                            | <input type="radio"/>                              | <input type="radio"/> | <input type="radio"/>               | <input type="radio"/>          | <input type="radio"/>       | <input type="radio"/> |
| Support for carers                                                                           | <input type="radio"/>                              | <input type="radio"/> | <input type="radio"/>               | <input type="radio"/>          | <input type="radio"/>       | <input type="radio"/> |
| Where to find more information on Parkinson's                                                | <input type="radio"/>                              | <input type="radio"/> | <input type="radio"/>               | <input type="radio"/>          | <input type="radio"/>       | <input type="radio"/> |
| Taking part in clinical trials                                                               | <input type="radio"/>                              | <input type="radio"/> | <input type="radio"/>               | <input type="radio"/>          | <input type="radio"/>       | <input type="radio"/> |

### 26. If you were given information, how helpful was it?

|                       |                       |                       |                       |                       |                             |
|-----------------------|-----------------------|-----------------------|-----------------------|-----------------------|-----------------------------|
| Very helpful          | Quite helpful         | Not very helpful      | Not helpful           | Cannot remember       | No information was provided |
| <input type="radio"/> | <input type="radio"/> | <input type="radio"/> | <input type="radio"/> | <input type="radio"/> | <input type="radio"/>       |

## 11. Getting a diagnosis of Parkinson's disease

**27. When you were given your diagnosis of Parkinson's, were you given time to ask questions and discuss your concerns?**

- Yes, I was given enough time
- Yes, but I would have liked more time
- No, I was not given any time
- I did not want to ask questions at that time
- I did not feel able to ask questions or discuss concerns at that time
- Cannot remember

**12. Your treatment**

**28. How soon after your diagnosis did you receive any medication or treatment therapy?**

- This was discussed but I decided against taking medication at that time
- Immediately
- Less than 1 month
- At least 1 month but less than 3 months
- At least 3 months but less than 6 months
- At least 6 months but less than 12 months
- 12 months or more
- Cannot remember
